# Supplementary material
Source: publisher figshare collection journal article supplement (https://acs.figshare.com/ndownloader/files/5186224)
Supplement: Supplementary file 1 [file 5186224]

 
data_mn3891a
 
_audit_creation_method            SHELXL-97
_chemical_name_systematic
;
 ?
;
_chemical_name_common             ?
_chemical_melting_point           ?
_chemical_formula_moiety          
;
(Mn 2+)6, (C O3 2-)12 (Na 1+)3, (N C4 H12 1+), (C N3 H6 1+)8, (H2 O)3
;
_chemical_formula_sum
 'C24 H66 Mn6 N25 Na3 O39'
_chemical_formula_weight          1727.63
 
loop_
 _atom_type_symbol
 _atom_type_description
 _atom_type_scat_dispersion_real
 _atom_type_scat_dispersion_imag
 _atom_type_scat_source
 'C'  'C'   0.0033   0.0016
 'International Tables Vol C Tables 4.2.6.8 and 6.1.1.4'
 'H'  'H'   0.0000   0.0000
 'International Tables Vol C Tables 4.2.6.8 and 6.1.1.4'
 'N'  'N'   0.0061   0.0033
 'International Tables Vol C Tables 4.2.6.8 and 6.1.1.4'
 'O'  'O'   0.0106   0.0060
 'International Tables Vol C Tables 4.2.6.8 and 6.1.1.4'
 'Mn'  'Mn'   0.3368   0.7283
 'International Tables Vol C Tables 4.2.6.8 and 6.1.1.4'
 'Na'  'Na'   0.0362   0.0249
 'International Tables Vol C Tables 4.2.6.8 and 6.1.1.4'
 
_symmetry_cell_setting            'Cubic'
_symmetry_space_group_name_H-M    'Im-3m'
 
loop_
 _symmetry_equiv_pos_as_xyz
 'x, y, z'
 '-x, -y, z'
 '-x, y, -z'
 'x, -y, -z'
 'z, x, y'
 'z, -x, -y'
 '-z, -x, y'
 '-z, x, -y'
 'y, z, x'
 '-y, z, -x'
 'y, -z, -x'
 '-y, -z, x'
 'y, x, -z'
 '-y, -x, -z'
 'y, -x, z'
 '-y, x, z'
 'x, z, -y'
 '-x, z, y'
 '-x, -z, -y'
 'x, -z, y'
 'z, y, -x'
 'z, -y, x'
 '-z, y, x'
 '-z, -y, -x'
 'x+1/2, y+1/2, z+1/2'
 '-x+1/2, -y+1/2, z+1/2'
 '-x+1/2, y+1/2, -z+1/2'
 'x+1/2, -y+1/2, -z+1/2'
 'z+1/2, x+1/2, y+1/2'
 'z+1/2, -x+1/2, -y+1/2'
 '-z+1/2, -x+1/2, y+1/2'
 '-z+1/2, x+1/2, -y+1/2'
 'y+1/2, z+1/2, x+1/2'
 '-y+1/2, z+1/2, -x+1/2'
 'y+1/2, -z+1/2, -x+1/2'
 '-y+1/2, -z+1/2, x+1/2'
 'y+1/2, x+1/2, -z+1/2'
 '-y+1/2, -x+1/2, -z+1/2'
 'y+1/2, -x+1/2, z+1/2'
 '-y+1/2, x+1/2, z+1/2'
 'x+1/2, z+1/2, -y+1/2'
 '-x+1/2, z+1/2, y+1/2'
 '-x+1/2, -z+1/2, -y+1/2'
 'x+1/2, -z+1/2, y+1/2'
 'z+1/2, y+1/2, -x+1/2'
 'z+1/2, -y+1/2, x+1/2'
 '-z+1/2, y+1/2, x+1/2'
 '-z+1/2, -y+1/2, -x+1/2'
 '-x, -y, -z'
 'x, y, -z'
 'x, -y, z'
 '-x, y, z'
 '-z, -x, -y'
 '-z, x, y'
 'z, x, -y'
 'z, -x, y'
 '-y, -z, -x'
 'y, -z, x'
 '-y, z, x'
 'y, z, -x'
 '-y, -x, z'
 'y, x, z'
 '-y, x, -z'
 'y, -x, -z'
 '-x, -z, y'
 'x, -z, -y'
 'x, z, y'
 '-x, z, -y'
 '-z, -y, x'
 '-z, y, -x'
 'z, -y, -x'
 'z, y, x'
 '-x+1/2, -y+1/2, -z+1/2'
 'x+1/2, y+1/2, -z+1/2'
 'x+1/2, -y+1/2, z+1/2'
 '-x+1/2, y+1/2, z+1/2'
 '-z+1/2, -x+1/2, -y+1/2'
 '-z+1/2, x+1/2, y+1/2'
 'z+1/2, x+1/2, -y+1/2'
 'z+1/2, -x+1/2, y+1/2'
 '-y+1/2, -z+1/2, -x+1/2'
 'y+1/2, -z+1/2, x+1/2'
 '-y+1/2, z+1/2, x+1/2'
 'y+1/2, z+1/2, -x+1/2'
 '-y+1/2, -x+1/2, z+1/2'
 'y+1/2, x+1/2, z+1/2'
 '-y+1/2, x+1/2, -z+1/2'
 'y+1/2, -x+1/2, -z+1/2'
 '-x+1/2, -z+1/2, y+1/2'
 'x+1/2, -z+1/2, -y+1/2'
 'x+1/2, z+1/2, y+1/2'
 '-x+1/2, z+1/2, -y+1/2'
 '-z+1/2, -y+1/2, x+1/2'
 '-z+1/2, y+1/2, -x+1/2'
 'z+1/2, -y+1/2, -x+1/2'
 'z+1/2, y+1/2, x+1/2'
 
_cell_length_a                    14.5662(8)
_cell_length_b                    14.5662(8)
_cell_length_c                    14.5662(8)
_cell_angle_alpha                 90.00
_cell_angle_beta                  90.00
_cell_angle_gamma                 90.00
_cell_volume                      3090.6(3)
_cell_formula_units_Z             2
_cell_measurement_temperature     293(2)
_cell_measurement_reflns_used     1055
_cell_measurement_theta_min       3.43
_cell_measurement_theta_max       25.09
 
_exptl_crystal_description        'square prism'
_exptl_crystal_colour             'colourless'
_exptl_crystal_size_max           0.10
_exptl_crystal_size_mid           0.10
_exptl_crystal_size_min           0.075
_exptl_crystal_density_meas       ?
_exptl_crystal_density_diffrn     1.856
_exptl_crystal_density_method     'not measured'
_exptl_crystal_F_000              1760
_exptl_absorpt_coefficient_mu     1.329
_exptl_absorpt_correction_type    'multi-scan'
_exptl_absorpt_correction_T_min   0.883
_exptl_absorpt_correction_T_max   1.000
_exptl_absorpt_process_details    
;
 Sheldrick, G. M. SADABS
;

 
_exptl_special_details
;
 ?
;
 
_diffrn_ambient_temperature       293(2)
_diffrn_radiation_wavelength      0.71073
_diffrn_radiation_type            MoK\a
_diffrn_radiation_source          'fine-focus sealed tube'
_diffrn_radiation_monochromator   graphite
_diffrn_measurement_device_type   'Bruker CCD area detector'
_diffrn_measurement_method        'phi and omega scans'
_diffrn_detector_area_resol_mean  ?
_diffrn_standards_number          ?
_diffrn_standards_interval_count  ?
_diffrn_standards_interval_time   ?
_diffrn_standards_decay_%         0
_diffrn_reflns_number             8211
_diffrn_reflns_av_R_equivalents   0.0739
_diffrn_reflns_av_sigmaI/netI     0.0189
_diffrn_reflns_limit_h_min        -17
_diffrn_reflns_limit_h_max        13
_diffrn_reflns_limit_k_min        -17
_diffrn_reflns_limit_k_max        17
_diffrn_reflns_limit_l_min        -17
_diffrn_reflns_limit_l_max        17
_diffrn_reflns_theta_min          1.98
_diffrn_reflns_theta_max          25.00
_reflns_number_total              305
_reflns_number_gt                 276
_reflns_threshold_expression      >2sigma(I)
 
_computing_data_collection        'Bruker SMART'
_computing_cell_refinement        'Bruker SMART'
_computing_data_reduction         'Bruker SAINT'
_computing_structure_solution     'Bruker SHELXTL'
_computing_structure_refinement   'SHELXL-97 (Sheldrick, 1997)'
_computing_molecular_graphics     ?
_computing_publication_material   ?
 
_refine_special_details
;
 The methyl groups of the tetramethylammonium ion were disordered over a
 number of sites. The carbon atoms of the cation were refined at 2 unique
 sites with appropriate site occupancies applied to these atoms.

 Refinement of F^2^ against ALL reflections.  The weighted R-factor wR and
 goodness of fit S are based on F^2^, conventional R-factors R are based
 on F, with F set to zero for negative F^2^. The threshold expression of
 F^2^ > 2sigma(F^2^) is used only for calculating R-factors(gt) etc. and is
 not relevant to the choice of reflections for refinement.  R-factors based
 on F^2^ are statistically about twice as large as those based on F, and R-
 factors based on ALL data will be even larger.
;
 
_refine_ls_structure_factor_coef  Fsqd
_refine_ls_matrix_type            full
_refine_ls_weighting_scheme       calc
_refine_ls_weighting_details
 'calc w=1/[\s^2^(Fo^2^)+(0.1012P)^2^+13.0000P] where P=(Fo^2^+2Fc^2^)/3'
_atom_sites_solution_primary      direct
_atom_sites_solution_secondary    difmap
_atom_sites_solution_hydrogens    geom
_refine_ls_hydrogen_treatment     mixed
_refine_ls_extinction_method      none
_refine_ls_extinction_coef        ?
_refine_ls_number_reflns          305
_refine_ls_number_parameters      40
_refine_ls_number_restraints      0
_refine_ls_R_factor_all           0.0610
_refine_ls_R_factor_gt            0.0562
_refine_ls_wR_factor_ref          0.1668
_refine_ls_wR_factor_gt           0.1640
_refine_ls_goodness_of_fit_ref    1.159
_refine_ls_restrained_S_all       1.159
_refine_ls_shift/su_max           0.000
_refine_ls_shift/su_mean          0.000
 
loop_
 _atom_site_label
 _atom_site_type_symbol
 _atom_site_fract_x
 _atom_site_fract_y
 _atom_site_fract_z
 _atom_site_U_iso_or_equiv
 _atom_site_adp_type
 _atom_site_occupancy
 _atom_site_symmetry_multiplicity
 _atom_site_calc_flag
 _atom_site_refinement_flags
 _atom_site_disorder_assembly
 _atom_site_disorder_group
N2 N 0.0000 0.0000 0.0000 0.064(9) Uani 1 48 d S . .
O3 O 0.0000 0.353(2) 0.0000 0.104(10) Uiso 0.50 8 d SP . .
C3 C 0.0000 0.0000 0.108(7) 0.05(2) Uiso 0.17 8 d SP . .
C4 C 0.0000 0.045(6) 0.098(5) 0.08(3) Uiso 0.13 2 d SP . .
Na1 Na 0.0000 0.5000 0.0000 0.069(3) Uani 1 16 d S . .
H1 H -0.218(4) 0.596(3) 0.342(4) 0.064(18) Uiso 1 1 d . . .
Mn1 Mn 0.0000 0.5000 0.2500 0.0361(8) Uani 1 8 d S . .
O1 O -0.1494(3) 0.5000 0.2582(3) 0.0357(11) Uani 1 2 d S . .
C1 C -0.1730(4) 0.5000 0.1730(4) 0.0329(19) Uani 1 4 d S . .
O2 O -0.1108(3) 0.5000 0.1108(3) 0.0538(19) Uani 1 4 d S . .
N1 N -0.2432(4) 0.6448(3) 0.3552(3) 0.0448(15) Uani 1 2 d S . .
C2 C -0.3172(4) 0.6828(4) 0.3172(4) 0.036(2) Uani 1 6 d S . .
 
loop_
 _atom_site_aniso_label
 _atom_site_aniso_U_11
 _atom_site_aniso_U_22
 _atom_site_aniso_U_33
 _atom_site_aniso_U_23
 _atom_site_aniso_U_13
 _atom_site_aniso_U_12
N2 0.064(9) 0.064(9) 0.064(9) 0.000 0.000 0.000
Na1 0.045(3) 0.117(9) 0.045(3) 0.000 0.000 0.000
Mn1 0.0290(8) 0.0290(8) 0.0503(13) 0.000 0.000 0.000
O1 0.033(2) 0.036(2) 0.038(2) 0.000 -0.0043(19) 0.000
C1 0.038(3) 0.024(4) 0.038(3) 0.000 0.005(4) 0.000
O2 0.054(3) 0.054(4) 0.054(3) 0.000 0.024(4) 0.000
N1 0.047(3) 0.044(2) 0.044(2) -0.007(3) -0.013(2) 0.013(2)
C2 0.036(2) 0.036(2) 0.036(2) -0.002(3) -0.002(3) 0.002(3)
 
_geom_special_details
;
 All esds (except the esd in the dihedral angle between two l.s. planes)
 are estimated using the full covariance matrix.  The cell esds are taken
 into account individually in the estimation of esds in distances, angles
 and torsion angles; correlations between esds in cell parameters are only
 used when they are defined by crystal symmetry.  An approximate (isotropic)
 treatment of cell esds is used for estimating esds involving l.s. planes.
;
 
loop_
 _geom_bond_atom_site_label_1
 _geom_bond_atom_site_label_2
 _geom_bond_distance
 _geom_bond_site_symmetry_2
 _geom_bond_publ_flag
N2 C4 1.57(8) 21 ?
N2 C4 1.57(8) 5 ?
N2 C4 1.57(8) 66 ?
N2 C4 1.57(8) 14 ?
N2 C4 1.57(8) 57 ?
N2 C4 1.57(8) 49 ?
N2 C4 1.57(8) 65 ?
N2 C4 1.57(8) 13 ?
N2 C4 1.57(8) 58 ?
N2 C4 1.57(8) 50 ?
N2 C4 1.57(8) . ?
N2 C4 1.57(8) 22 ?
O3 Na1 2.14(3) . ?
Na1 O3 2.14(3) 49_565 ?
Na1 O2 2.283(7) 2_565 ?
Na1 O2 2.283(7) . ?
Na1 O2 2.283(7) 49_565 ?
Na1 O2 2.283(7) 50 ?
Mn1 O1 2.180(4) 37_455 ?
Mn1 O1 2.180(4) 2_565 ?
Mn1 O1 2.180(4) . ?
Mn1 O1 2.180(4) 38 ?
O1 C1 1.288(6) . ?
C1 O2 1.281(11) . ?
C1 O1 1.288(6) 70 ?
N1 C2 1.332(6) . ?
C2 N1 1.332(6) 11_465 ?
C2 N1 1.332(6) 8_566 ?
 
loop_
 _geom_angle_atom_site_label_1
 _geom_angle_atom_site_label_2
 _geom_angle_atom_site_label_3
 _geom_angle
 _geom_angle_site_symmetry_1
 _geom_angle_site_symmetry_3
 _geom_angle_publ_flag
C4 N2 C4 35(4) 21 5 ?
C4 N2 C4 112(2) 21 66 ?
C4 N2 C4 100(2) 5 66 ?
C4 N2 C4 112(2) 21 14 ?
C4 N2 C4 140(6) 5 14 ?
C4 N2 C4 68(2) 66 14 ?
C4 N2 C4 140(6) 21 57 ?
C4 N2 C4 112(2) 5 57 ?
C4 N2 C4 35(4) 66 57 ?
C4 N2 C4 80(2) 14 57 ?
C4 N2 C4 100(2) 21 49 ?
C4 N2 C4 112(2) 5 49 ?
C4 N2 C4 40(6) 66 49 ?
C4 N2 C4 35(4) 14 49 ?
C4 N2 C4 68(2) 57 49 ?
C4 N2 C4 112(2) 21 65 ?
C4 N2 C4 80(2) 5 65 ?
C4 N2 C4 50(6) 66 65 ?
C4 N2 C4 112(2) 14 65 ?
C4 N2 C4 35(4) 57 65 ?
C4 N2 C4 90.000(1) 49 65 ?
C4 N2 C4 68(2) 21 13 ?
C4 N2 C4 90.000(1) 5 13 ?
C4 N2 C4 68(2) 66 13 ?
C4 N2 C4 50(6) 14 13 ?
C4 N2 C4 100(2) 57 13 ?
C4 N2 C4 35(4) 49 13 ?
C4 N2 C4 112(2) 65 13 ?
C4 N2 C4 90.000(1) 21 58 ?
C4 N2 C4 68(2) 5 58 ?
C4 N2 C4 35(4) 66 58 ?
C4 N2 C4 100(2) 14 58 ?
C4 N2 C4 50(6) 57 58 ?
C4 N2 C4 68(2) 49 58 ?
C4 N2 C4 35(4) 65 58 ?
C4 N2 C4 80(2) 13 58 ?
C4 N2 C4 80(2) 21 50 ?
C4 N2 C4 112(2) 5 50 ?
C4 N2 C4 90.000(1) 66 50 ?
C4 N2 C4 35(4) 14 50 ?
C4 N2 C4 112(2) 57 50 ?
C4 N2 C4 50(6) 49 50 ?
C4 N2 C4 140(6) 65 50 ?
C4 N2 C4 35(4) 13 50 ?
C4 N2 C4 112(2) 58 50 ?
C4 N2 C4 80(2) 21 . ?
C4 N2 C4 68(2) 5 . ?
C4 N2 C4 140(6) 66 . ?
C4 N2 C4 145(4) 14 . ?
C4 N2 C4 112(2) 57 . ?
C4 N2 C4 180(6) 49 . ?
C4 N2 C4 90.000(1) 65 . ?
C4 N2 C4 145(4) 13 . ?
C4 N2 C4 112(2) 58 . ?
C4 N2 C4 130(6) 50 . ?
C4 N2 C4 50(6) 21 22 ?
C4 N2 C4 35(4) 5 22 ?
C4 N2 C4 68(2) 66 22 ?
C4 N2 C4 112(2) 14 22 ?
C4 N2 C4 90.0 57 22 ?
C4 N2 C4 80(2) 49 22 ?
C4 N2 C4 68(2) 65 22 ?
C4 N2 C4 68(2) 13 22 ?
C4 N2 C4 40(6) 58 22 ?
C4 N2 C4 100(2) 50 22 ?
C4 N2 C4 100(2) . 22 ?
O3 Na1 O3 180.000(1) 49_565 . ?
O3 Na1 O2 90.000(1) 49_565 2_565 ?
O3 Na1 O2 90.000(2) . 2_565 ?
O3 Na1 O2 90.000(1) 49_565 . ?
O3 Na1 O2 90.000(1) . . ?
O2 Na1 O2 90.0 2_565 . ?
O3 Na1 O2 90.000(1) 49_565 49_565 ?
O3 Na1 O2 90.000(1) . 49_565 ?
O2 Na1 O2 90.0 2_565 49_565 ?
O2 Na1 O2 180.0 . 49_565 ?
O3 Na1 O2 90.000(1) 49_565 50 ?
O3 Na1 O2 90.000(1) . 50 ?
O2 Na1 O2 180.0 2_565 50 ?
O2 Na1 O2 90.0 . 50 ?
O2 Na1 O2 90.0 49_565 50 ?
O1 Mn1 O1 90.172(13) 37_455 2_565 ?
O1 Mn1 O1 90.172(13) 37_455 . ?
O1 Mn1 O1 173.7(2) 2_565 . ?
O1 Mn1 O1 173.7(2) 37_455 38 ?
O1 Mn1 O1 90.172(13) 2_565 38 ?
O1 Mn1 O1 90.172(13) . 38 ?
C1 O1 Mn1 102.3(4) . . ?
O2 C1 O1 119.5(4) . . ?
O2 C1 O1 119.5(4) . 70 ?
O1 C1 O1 121.0(8) . 70 ?
C1 O2 Na1 180.0(5) . . ?
N1 C2 N1 119.99(2) . 11_465 ?
N1 C2 N1 119.99(2) . 8_566 ?
N1 C2 N1 119.99(2) 11_465 8_566 ?
 
_diffrn_measured_fraction_theta_max    0.997
_diffrn_reflns_theta_full              25.00
_diffrn_measured_fraction_theta_full   0.997
_refine_diff_density_max    1.494
_refine_diff_density_min   -0.968
_refine_diff_density_rms    0.117
